# Supplementary material for: Cancer-associated mutations reveal a novel role for EpCAM as an inhibitor of cathepsin-L and tumor cell invasion
Source: Springer Nature journal article supplement (doi:10.1186/s12885-021-08239-z), 2021-05-12

Fig. S2.

A.

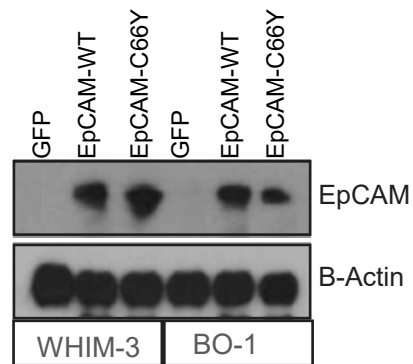

Figure S2A. Wild type, but not C66Y EpCAM, inhibits tumor cell invasion in vitro and in vivo. WHIM-3 and PyMT BO-1 breast cancer cell lines were transduced with GFP, wild type EpCAM, or C66Y EpCAM. Immunoblot data is shown.

B. WHIM-3: EpCAM flow cytometry

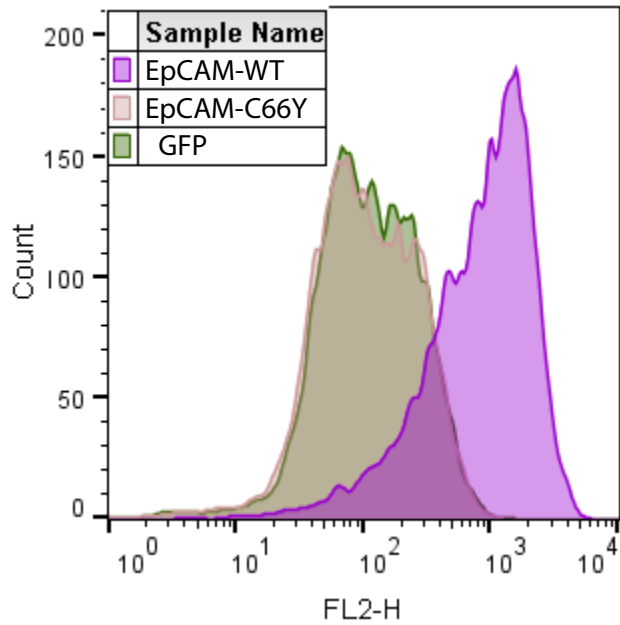

C. BO-1: EpCAM flow cytometry

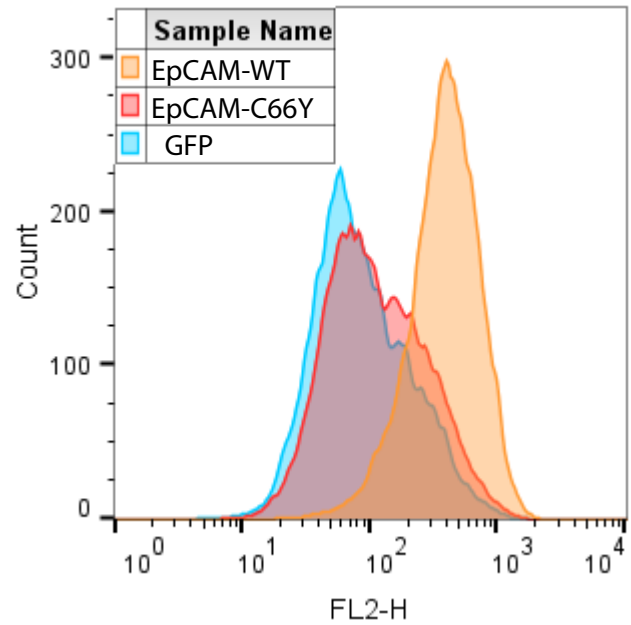

Supplement: MOESM2 [file 19158046]
