# Supplementary material for: Cancer-associated mutations reveal a novel role for EpCAM as an inhibitor of cathepsin-L and tumor cell invasion
Source: Springer Nature journal article supplement (doi:10.1186/s12885-021-08239-z), 2021-05-12

Fig. S3.

A.

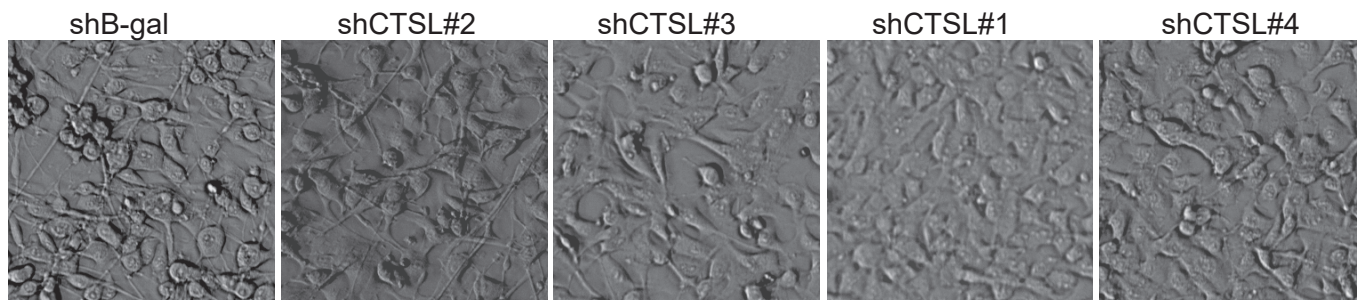

B.

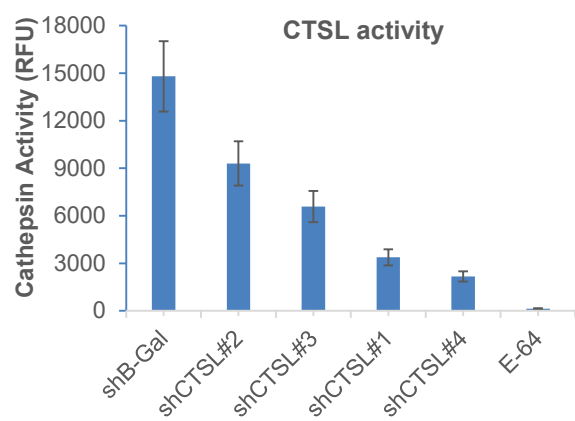

C.

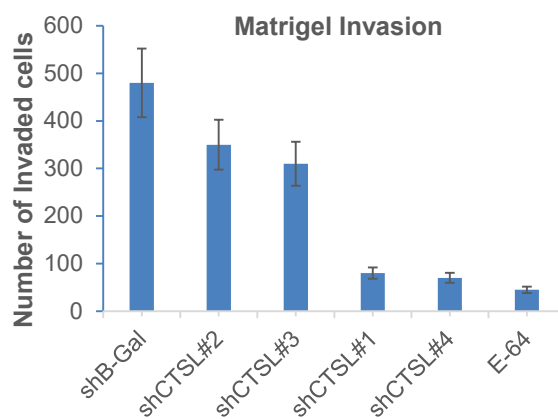

D.

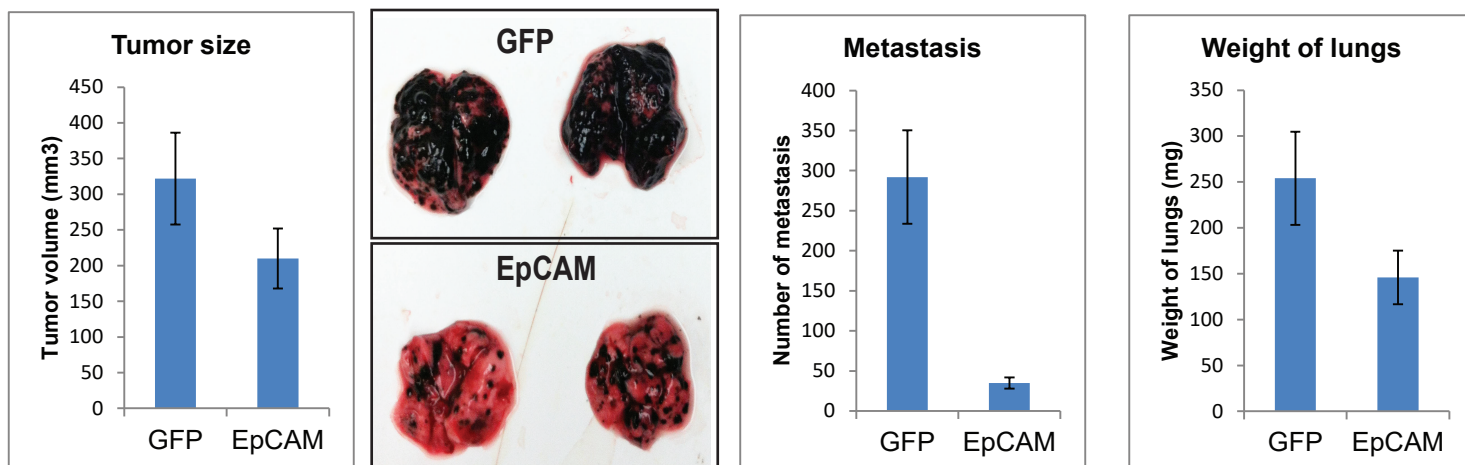

Supplement: MOESM3 [file 19158046]
